# Supplementary material
Source: bioRxiv or medRxiv preprint supplement (https://www.biorxiv.org/highwire/filestream/51844/field_highwire_adjunct_files/1/111880-2.pdf)
Supplement: Supplementary file [file 111880-2.pdf]

# Supplementary Table 2

## List of 20 most depleted six-mers in the WT coding region

| Six-mer | Log2 Fold Change | Zscore in Recoded | Remarks                                                                                                                                                                                                                             |
|---------|------------------|-------------------|-------------------------------------------------------------------------------------------------------------------------------------------------------------------------------------------------------------------------------------|
| AATAAT  | -1.87            | -40               | -10 motif of 24 WT constitutive genes, for example <i>yifB</i>                                                                                                                                                                      |
| AGAATG  | -1.86            | -37               | Any base (A/T/G/C) upstream to this six-mer creates a -10 motif found in WT constitutive genes                                                                                                                                      |
| ATAATA  | -2.03            | -36               | Anti-sense -10 motif of 13 WT constitutive genes, for example <i>osmB</i>                                                                                                                                                           |
| ATAATG  | -1.90            | -40               | Anti-sense -10 motif of a WT constitutive gene <i>yfdV</i>                                                                                                                                                                          |
| GAGAAT  | -1.99            | -39               | -10 motif of a WT constitutive gene <i>fabI</i>                                                                                                                                                                                     |
| GACAAT  | -1.55            | -34               | -10 motif of a WT constitutive gene <i>yghW</i>                                                                                                                                                                                     |
| AGGAGG  | -2.80            | -36               | Ribosome binding site motif                                                                                                                                                                                                         |
| GAGGAG  | -2.49            | -36               | Ribosome binding site motif ( <a href="http://parts.igem.org/Ribosome_Binding_Sites/Catalog">http://parts.igem.org/Ribosome_Binding_Sites/Catalog</a> )                                                                             |
| GGAGAC  | -2.44            | -33               | Ribosome binding site motif ( <a href="http://parts.igem.org/Ribosome_Binding_Sites/Prokaryotic/Constitutive/Anderson">http://parts.igem.org/Ribosome_Binding_Sites/Prokaryotic/Constitutive/Anderson</a> )                         |
| GAGGGA  | -2.93            | -33               | Ribosome binding site motif ( <a href="http://parts.igem.org/Ribosome_Binding_Sites/Prokaryotic/Constitutive/Community_Collection">http://parts.igem.org/Ribosome_Binding_Sites/Prokaryotic/Constitutive/Community_Collection</a> ) |
| GGAGGG  | -2.87            | -33               | Ribosome binding site motif ( <a href="http://parts.igem.org/Ribosome_Binding_Sites/Prokaryotic/Constitutive/Anderson">http://parts.igem.org/Ribosome_Binding_Sites/Prokaryotic/Constitutive/Anderson</a> )                         |
| GGAGGA  | -2.33            | -35               | Ribosome binding site motif ( <a href="http://parts.igem.org/Ribosome_Binding_Sites/Catalog">http://parts.igem.org/Ribosome_Binding_Sites/Catalog</a> )                                                                             |
| AAGGAG  | -2.38            | -34               | Ribosome binding site motif ( <a href="http://parts.igem.org/Ribosome_Binding_Sites/Catalog">http://parts.igem.org/Ribosome_Binding_Sites/Catalog</a> )                                                                             |
| GAGGAA  | -1.81            | -34               | Ribosome binding site motif ( <a href="http://parts.igem.org/Ribosome_Binding_Sites/Catalog">http://parts.igem.org/Ribosome_Binding_Sites/Catalog</a> )                                                                             |
| ATGGAG  | -1.51            | -33               | Ribosome binding site motif ( <a href="http://parts.igem.org/Ribosome_Binding_Sites/Prokaryotic/Constitutive/Anderson">http://parts.igem.org/Ribosome_Binding_Sites/Prokaryotic/Constitutive/Anderson</a> )                         |
| CTTGGA  | -3.54            | -34               | Ribosome binding site motif ( <a href="http://parts.igem.org/Ribosome_Binding_Sites/Prokaryotic/Constitutive/Anderson">http://parts.igem.org/Ribosome_Binding_Sites/Prokaryotic/Constitutive/Anderson</a> )                         |
| TTGGAG  | -3.31            | -35               | Ribosome binding site motif ( <a href="http://parts.igem.org/Ribosome_Binding_Sites/Prokaryotic/Constitutive/Anderson">http://parts.igem.org/Ribosome_Binding_Sites/Prokaryotic/Constitutive/Anderson</a> )                         |
| TTTGGA  | -2.79            | -33               | Ribosome binding site motif ( <a href="http://parts.igem.org/Ribosome_Binding_Sites/Prokaryotic/Constitutive/Anderson">http://parts.igem.org/Ribosome_Binding_Sites/Prokaryotic/Constitutive/Anderson</a> )                         |
| TTGGAA  | -2.76            | -34               | Ribosome binding site motif ( <a href="http://parts.igem.org/Ribosome_Binding_Sites/Prokaryotic/Constitutive/Anderson">http://parts.igem.org/Ribosome_Binding_Sites/Prokaryotic/Constitutive/Anderson</a> )                         |
| ATAGAC  | -3.61            | -33               | Part of the DNA binding sequence of the <i>MetJ</i> (represses genes involved in biosynthesis and transport of methionine)                                                                                                          |

## List of 20 most over-represented six-mers in the WT coding region

| Six-mer | Log2 Fold Change | Zscore in Recoded | Remarks                                                                                                                     |
|---------|------------------|-------------------|-----------------------------------------------------------------------------------------------------------------------------|
| GCTGGA  | +1.77            | 101               | Part of E.coli's Chi sequence                                                                                               |
| GCTGGT  | +1.74            | 89                | Part of E.coli's Chi sequence                                                                                               |
| CTGGTG  | +1.99            | 103               | Part of E.coli's Chi sequence                                                                                               |
| CTGGCG  | +2.32            | 158               | Part of E.coli's Chi sequence                                                                                               |
| CTGCTG  | +1.95            | 98                | Part of E.coli's Chi sequence                                                                                               |
| TGCTGG  | +1.99            | 124               | Part of E.coli's Chi sequence                                                                                               |
| GTGCTG  | +1.97            | 92                | Part of E.coli's Chi sequence                                                                                               |
| CGCTGG  | +2.34            | 156               | Part of E.coli's Chi sequence                                                                                               |
| GCTGGC  | +1.94            | 119               | Part of E.coli's Chi sequence                                                                                               |
| GCGCTG  | +2.21            | 130               | Part of E.coli's Chi sequence                                                                                               |
| CCGCTG  | +1.81            | 83                | Part of E.coli's Chi sequence                                                                                               |
| TGGCGC  | +1.66            | 82                | Part of E.coli's Chi sequence                                                                                               |
| TGATTG  | +3.36            | 162               | Part of consensus sequence of <i>murR</i> (DNA binding protein repressing genes involved in catabolism of cell wall sugars) |
| GTGATT  | +2.93            | 110               | Part of consensus sequence of <i>murR</i> (DNA binding protein repressing genes involved in catabolism of cell wall sugars) |
| CTGATT  | +2.75            | 117               | Part of consensus sequence of <i>murR</i> (DNA binding protein repressing genes involved in catabolism of cell wall sugars) |
| TGATTA  | +2.44            | 94                | Part of consensus sequence of <i>murR</i> (DNA binding protein repressing genes involved in catabolism of cell wall sugars) |
| GATTGC  | +2.33            | 87                | Part of consensus sequence of <i>murR</i> (DNA binding protein repressing genes involved in catabolism of cell wall sugars) |
| GCGATT  | +2.13            | 81                | Part of consensus sequence of <i>Cra</i> DNA binding protein (catabolic repression)                                         |
| ATTGAT  | +2.44            | 85                | -----                                                                                                                       |
| ATTGCC  | +2.46            | 106               | -----                                                                                                                       |

### Supplementary Table 2:

#### Counting all six-mers in the coding region of *E. coli* shows depletion of promoter motifs and ribosome-binding sites

We counted occurrences for each possible six-mer in all *E. coli* genes. In addition, we did the same counting but for the 1000 alternative versions we recoded (by encoding the same amino acid sequence and while preserving the overall codon bias). Next, we compared the Z-score for each six-mer representing the rank of the WT count to the 1000 recoded genomes. Shown in the table are the 40 six-mers with the most extreme Z-scores, 20 from each side (20 most depleted six-mers in the upper part of the table, and 20 most over-represented six-mers in the lower part of the table). Overall, promoter motifs (specifically 'minus-10') and ribosome binding site motifs are depleted in the coding region of *E. coli*. On the other hand, Chi sequences are over represented in the coding region.
